- A-1123** Room G, 10/16/2000 9:00 AM - 11:00 AM (PS)  
**Cardiac Arrest Data Acquisition Database Query on Epinephrine Usage Vs Electronic Careprovider Self-Reporting** Steven Lussos, M.D.; James Koch, M.D.; Jay Iaconetti, M.D.; James Edmiston, M.A., *Anesthesiology, Inova Fairfax Hospital, Falls Church, VA.* The Epinephrine Query identified periop CAs more reliably than voluntary reporting by careproviders.
- A-1124** Room G, 10/16/2000 9:00 AM - 11:00 AM (PS)  
**Males Appear More Susceptible to Ulnar Nerve Ischemia Than Females** Robert C. Morell, M.D.; Richard C. Prielipp, M.D.; John F. Butterworth, M.D.; Timothy N. Harwood, M.D.; Francis O. Walker, M.D., *Dept. of Anesth., Wake Forest Univ. School of Med., Winston-Salem, NC, United States.* Men have greater alterations than women in 2000 Hz ulnar nerve current perception thresholds during tourniquet-induced arm ischemia.
- A-1125** Room G, 10/16/2000 9:00 AM - 11:00 AM (PS)  
**Postoperative Patient Transport - A Survey of New Jersey Practice** Kalpana Nandiwada, M.D.; Dennis B. Hall, M.D.; Steven H. Ginsberg, M.D.; Sheldon Goldstein, M.D.; Lawrence G. Kusbins, M.D., *Anesthesia, UMDNJ-RWJMS, New Brunswick, NJ, United States.* A survey of NJ postanesthesia transport practice revealed that O<sub>2</sub> and cylinder holders are often not immediately available.
- A-1126** Room G, 10/16/2000 9:00 AM - 11:00 AM (PS)  
**Cardiac Arrest or Death in the Operating Room or within 24 Hours of Anesthesia and Surgery** Myrna C. Newland, MD; Sheila K. Ellis, MD; Carol A. Lydiatt, MD; K. Reed Peters, MD; John H. Tinker, MD, *Anesthesiology, U of NE Medical Center, Omaha, NE, United States.* A study to determine the real anesthesia mortality rate out of 72,959 cases resulted in a rate between 1/12,159 to 1/72,959.
- A-1127** Room G, 10/16/2000 9:00 AM - 11:00 AM (PS)  
**Ionized Magnesium in the Intraoperative Hemodynamic Management of Pheochromocytoma Patients with Magnesium Sulfate** Manabu Otsuki, M.D.; Kenichi Aoki, M.D.; Kaneyuki Kawamae, M.D.; Masabiro Murakawa, *Dept. of Anesthesiology, Fukubima Medical University, Fukubima, Japan.* The measurement of ionized magnesium is useful for the management of pheochromocytoma patients with magnesium sulfate.
- A-1128** Room G, 10/16/2000 9:00 AM - 11:00 AM (PS)  
**Effects of Lithotomy Position and External Compression on Lower Leg Muscle Compartment Pressure** Susanne D. Pfeffer, MD; John R. Halliwill, PhD; Michael J. Joyner, MD; David O. Warner, MD; Mark A. Warner, MD, *Anesthesiology, Mayo Medical Center, Rochester, MN, United States.* Lithotomy position increases but external compression decreases intracompartment pressure in the lower leg.
- A-1129** Room G, 10/16/2000 9:00 AM - 11:00 AM (PS)  
**Prediction of Body Temperature Increasing during Thermal Ablation of Liver Tumors Using a Radiofrequency Wave** Maiko Sawada; Hideaki Tsuda; Shinichi Yamada; Seiji Watanabe; Tatsubiko Kano, *Anesthesiology, Kurume University School of Medicine, Kurume, Fukuoka, Japan.* Close observation of BT and output energy, and preparation of cooling measures are needed in RFA of liver tumors.
- A-1130** Room G, 10/16/2000 9:00 AM - 11:00 AM (PS)  
**Perioperative Morbidity in a Third World v. Industrialized Country-Statistics and Factors from a Neurosurgical Outreach Program** Jay H. Shapiro, M.D.; J.D. Ward, M.D.; Becky Burgess, B.S., *Anesthesiology, Medical College of Virginia, Richmond, VA, United States.* Retrospective Analysis of Anesthetic Morbidity During A Medical Outreach Mission Over a 4 Year Period.
- A-1131** Room G, 10/16/2000 9:00 AM - 11:00 AM (PS)  
**Comparison of Nasal Versus Oral Fiberoptic Laryngoscopy in Patients Breathing Spontaneously through a Cuffed Oropharyngeal Airway: A Pilot Study** Peter Szmuk, MD; Tiberiu Ezri, MD; James Berry, MD; Daniel Geva, MD; Jeffrey Katz, MD, *Anesthesiology, University of Texas Medical School, Houston, TX, United States.* Nasal fiberoptic behind the COPA was more successful than oral FO (100% versus 50%)
- A-1132** Room G, 10/16/2000 9:00 AM - 11:00 AM (PS)  
**Incidence of Fat and Bone Marrow Embolism during Iliac Side Implantation of Total Hip Arthroplasty** Masaki Takashina, M.D.; Hiroshi Ueyama, M.D.; Takashi Mashimo, M.D., *Surgical Center, Osaka University Hospital, Suita, Osaka, Japan.* We confirmed the incidence of the fat and bone marrow embolism during iliac side implantation of THA. Severe reduction of SpO<sub>2</sub> was observed in one third of patients.
- A-1133** Room G, 10/16/2000 9:00 AM - 11:00 AM (PS)  
**Dental Injuries in Anesthesia: Incidence and Preventive Strategies** Tod F. Tolan, MD; Sue Westerfield; Doug Irvine, MD; Terry Clark, DMD, *Oregon Anesthesiology Group P.C., Portland, OR, United States.* Dental injuries were 40 per 277,280 anesthetics (1:7000). Position of the injured teeth suggested 2 probable mechanisms of injury, plus practical preventive strategies.
- A-1134** Room G, 10/16/2000 9:00 AM - 11:00 AM (PS)  
**Ultrasound Guided Puncture of the Internal Jugular Vein in Pediatric Neurosurgical Patients: Effects of Body Position and PEEP** H. Trautner, M.D.; C.A. Greim, M.D.; I. Danbauser-Leistner, M.D.; N. Roewer, M.D., *Anesthesiology, University Hospital, Wuerzburg, Germany.* In 98% of 120 pediatric patients, successful central vein puncture guided by sonography was independent of body position and PEEP.
- A-1135** Room G, 10/16/2000 9:00 AM - 11:00 AM (PS)  
**Consenting Patients for Clinical Trials in Anesthesia - A Randomized Study on Factors Influencing the Patients' Acceptance** Tanja A. Treschan, M.D.; Thomas Scheck, B.S.; Alexander Kober, M.D.; Edith Fleischmann, M.D.; Franz X. Lackner, M.D., *FACA, Department of Anesthesiology and Intensive Care, University of Vienna, Vienna, Austria.* Risk level determines willingness to consent for research.
- A-1136** Room G, 10/16/2000 9:00 AM - 11:00 AM (PS)  
**Visual Loss Complicating Surgery: Review of 21 Cases** Maninderdip Uppal, M.D.; Karen Posner, Ph.D.; Steven Roth, M.D., *Anesthesiology, University of Washington Medical Center, Seattle, WA.* We identified 21 cases of post-operative vision loss. A variety of factors have been associated with this devastating injury but mechanisms remain theoretical.
